# Supplementary material for: Lateral septum adenosine A2A receptors control stress-induced depressive-like behaviors via signaling to the hypothalamus and habenula
Source: PubMed Central journal article supplement (PMC10076302; doi:10.1038/s41467-023-37601-x), 2023-04-05
Supplement: 41467_2023_37601_MOESM1_ESM.pdf [file 41467_2023_37601_MOESM1_ESM.pdf]

## Supplementary data

Supplementary Table 1

### Up-regulation of A<sub>2A</sub>R in CNS diseases

| Position                      | Associated CNS Disorder   | Resource                                 | Detection methods                  | Referneces                            |
|-------------------------------|---------------------------|------------------------------------------|------------------------------------|---------------------------------------|
| Hippocampal synapses          | Alzheimer's disease (AD)  | 3xTg AD mice                             | radioligand binding                | Silva et al. 2018 NbDis               |
|                               |                           | AD patients                              | Western blot analysis              | Temido-Ferreira et al. 2020 Mol Psych |
|                               |                           | A $\beta$ -injected mice                 | radioligand binding                | Gonçaves et al., 2019 NbDis           |
|                               |                           | APP-PS1 mice                             | radioligand binding                | Viana da Silva et al. 2016 Mat Comm   |
|                               | Aging                     | aged rats                                | radioligand binding / Western blot | Rebola et al., 2003 JNPhys            |
|                               |                           | aged rats                                | Western blot                       | Canas et al., 2009 NbAg               |
|                               | Diabetic neuropathy       | NONcNZO10/LtJ mice                       | radioligand binding                | Duarte et al., 2012 Plos1             |
|                               | Epilepsy                  | kainate-injected mice                    | radioligand binding                | Canas et al., 2018 eNeuro             |
|                               |                           | kainate-injected mice                    | radioligand binding                | Augusto et al., 2021 NbDis            |
|                               |                           | kainate-injected rats                    | radioligand binding                | Cognato et al., 2010 JNC              |
|                               | Depression                | helpless mice                            | radioligand binding                | Machado et al., 2018 Mol Nb           |
|                               |                           | CUS-stressed mice                        | radioligand binding                | Kaster et al., 2015 PNAS              |
|                               |                           | restraint stress rats                    | radioligand binding                | Cunha et al., 2006 Neuroscience       |
|                               | Angelman                  | Ube3a mice                               | radioligand binding                | Moreira de Sá et al., 2020 NbDis      |
|                               | Cerebrocortical synapses  | Attention Deficit Hyperactivity Disorder | SHR rats                           | Western blot                          |
| Epilepsy                      |                           | kainate-injected rats                    | radioligand binding/ Western blot  | Rebola et al., 2005 Epilepsia         |
|                               |                           | Febrile seizures rats                    | radioligand binding                | Crespo et al., 2018, EpBeh            |
| Rasmussen's encephalitis (RE) |                           | RE patients                              | Western blot                       | He et al., 2020 Brain Pathol          |
| Cortico-striatal synapses     | Parkinson's disease (PD)  | 6-OHDA-injected rats                     | radioligand binding                | Carmo et al., 2019, BJP               |
|                               | Huntington's disease (HD) | R6/2 mice                                | radioligand binding                | Li et al., 2015, NdDis                |

|                     |                              |                     |                                       |                                |
|---------------------|------------------------------|---------------------|---------------------------------------|--------------------------------|
|                     | Restless Leg Syndrome        | BID rats            | FACS-based synaptometry               | Rodrigues et al., 2022, Biomol |
| Cerebellar synapses | Machado-Joseph disease (MJD) | MJD transgenic mice | radioligand binding/<br>Mrna analysis | Gonçalves et al., 2017, AnnNeu |

CUS: chronic mild unpredictable stressed; Ube3a: ubiquitin protein ligase E3A; SHR: spontaneously hypertensive; BID: Brain iron deficiency.

Supplementary figures and figure legends

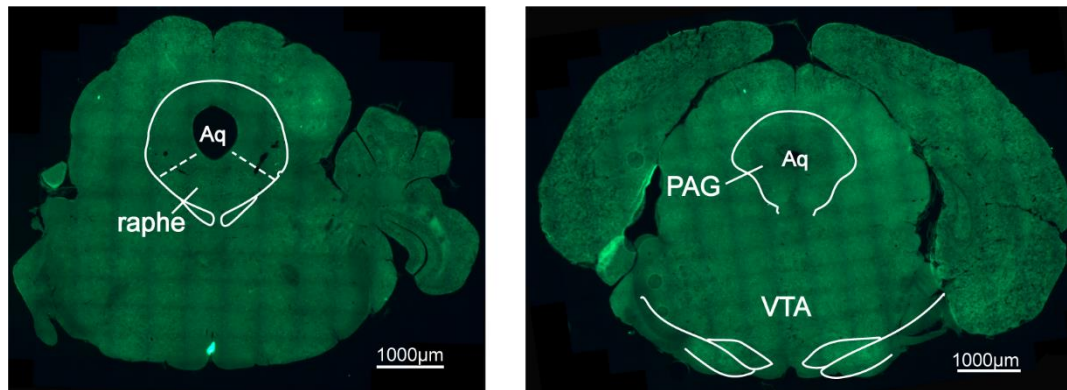

**Figure S1. No positive-EYFP signal was found in raphe, periaqueductal gray (PAG) and ventral tegmental area (VTA) .**

Confocal images of coronal sections showing no positive-EYFP signal was found in raphe (left), PAG and VTA (right) of  $A_{2A}R$ -Cre mice three weeks after receiving AAV2/9-syn-DIO-EYFP injection into the LS. Aq, aqueduct. Scale bar: 1000  $\mu$ m.

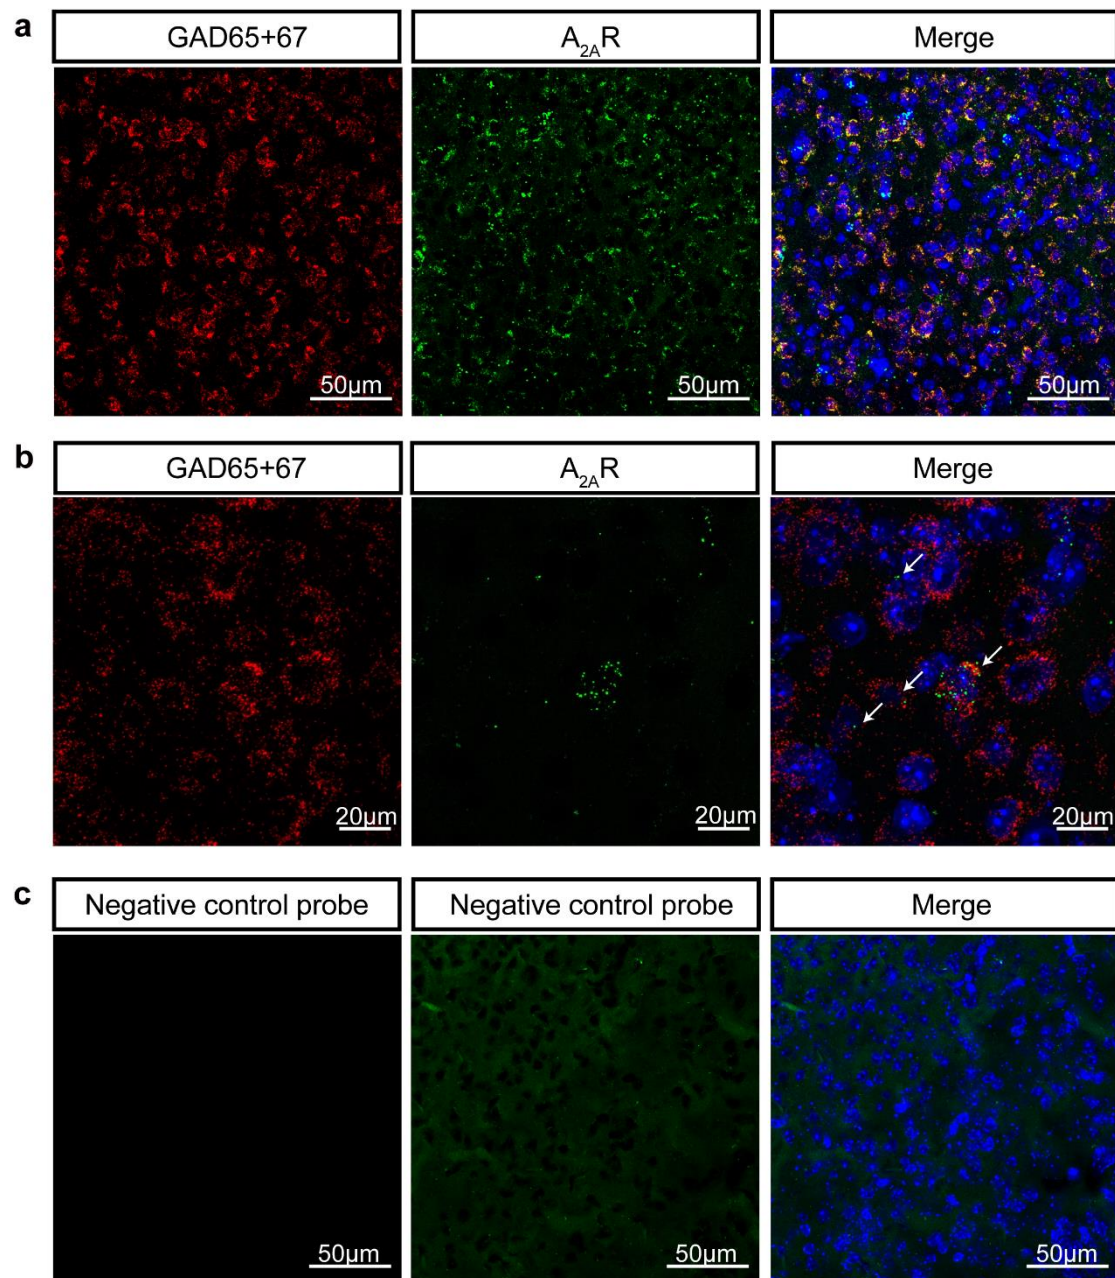

**Figure S2. A<sub>2A</sub>R are expressed essentially in lateral septum (LS)-GABAergic neurons.**

(a, b) Representative images of RNA scope *in situ* hybridization using probe against A<sub>2A</sub>R (green) and GAD65+67 (red) at 20× (A) and 63× (B) magnification in LS of C57BL/6J mice. (c) Representative images using negative control probe (20×). Nuclei are stained with DAPI in blue. Scale bar: 50/20 μm.

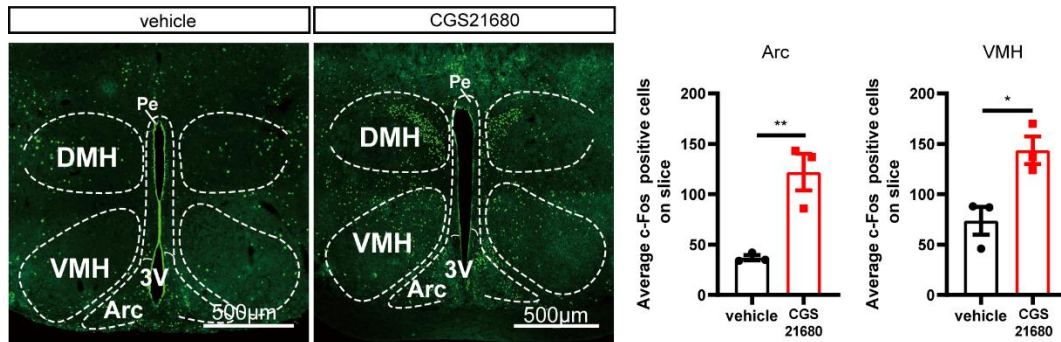

**Figure S3.  $A_{2A}R$  agonist CGS21680 injection into the lateral septum (LS) increases c-Fos expression in the ventromedial hypothalamic (VMH) and arcuate hypothalamic (Arc)**

Representative immunofluorescence images and average bar graphs illustrating the increased expression of c-Fos in the Arc (n=3 mice/group, two-sided Unpaired t test,  $p=0.0096$ ,  $t(4)=4.656$ ) and VMH (n=3 mice/group, two-sided Welch's t test,  $p=0.0228$ ,  $t(4)=3.596$ ) after focal microinjection of the  $A_{2A}R$  agonist CGS21680 into the LS. DMH, dorsomedial hypothalamus; Pe, periventricular hypothalamic nucleus; 3V, 3rd ventricle. Scale bars: 500  $\mu\text{m}$ . Data were shown as mean  $\pm$  SEM. \* $p < 0.05$ , \*\* $p < 0.01$ . Source data are provided as a Source Data file.

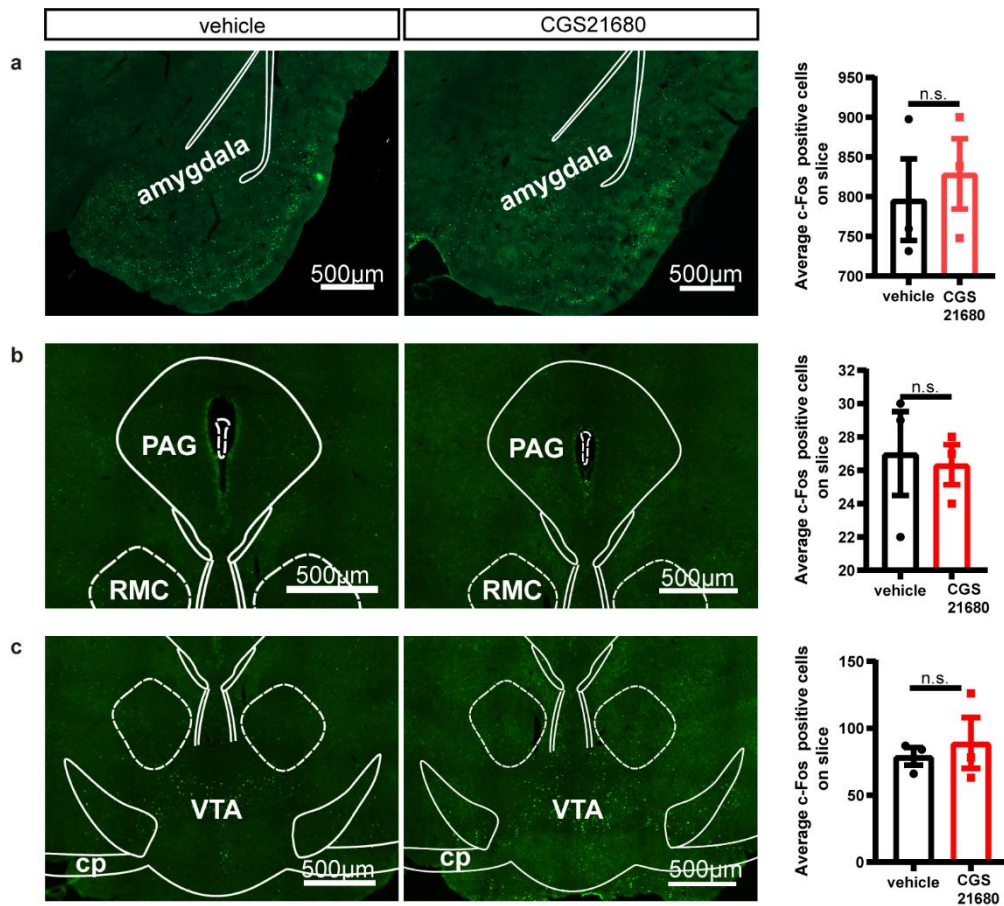

**Figure S4.  $A_{2A}R$  agonist CGS21680 injection into the lateral septum (LS) do not change c-Fos expression in the amygdala, periaqueductal gray (PAG) and ventral tegmental area (VTA).**

Representative immunofluorescence images and average bar graph illustrating the similar expression of c-Fos in amygdala ( $n=3$  mice/group, two-sided Unpaired t test,  $p=0.6561$ ,  $t(4)=0.4803$ ) (a), PAG ( $n=3$  mice/group, two-sided Unpaired t test,  $p=0.8228$ ,  $t(4)=0.2390$ ) (b) and VTA ( $n=3$  mice/group, two-sided Unpaired t test,  $p=0.6449$ ,  $t(4)=0.4975$ ) (c) after focal microinjection of the  $A_{2A}R$  agonist CGS21680 into LS. Data are mean  $\pm$  SEM. RMC: red nucleus, magnocellular part; cp: cerebral peduncle. Data were shown as mean  $\pm$  SEM, n.s., no significant difference. Source data are provided as a Source Data file.

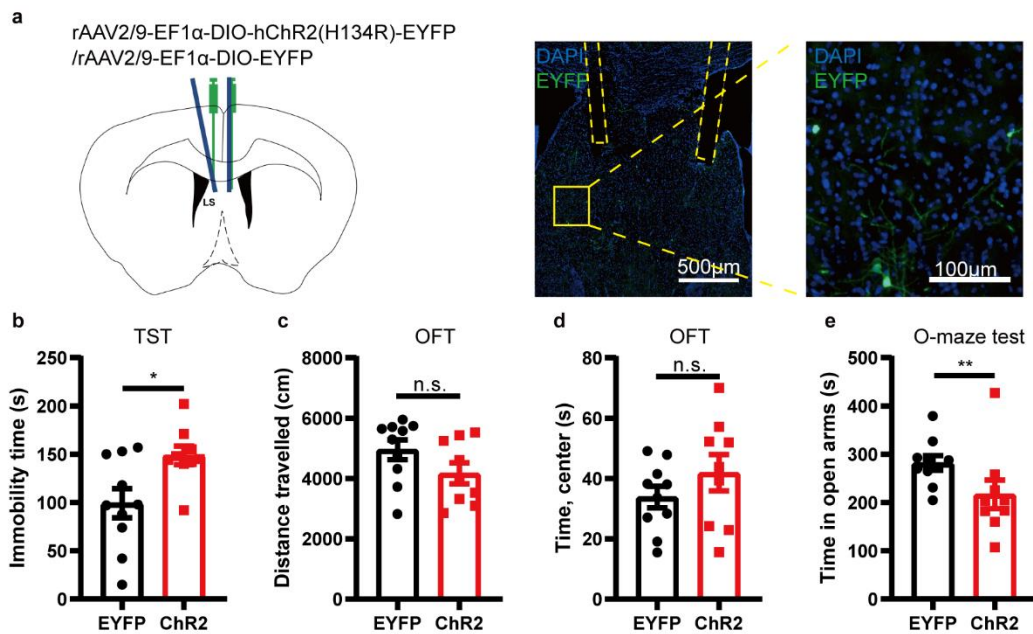

**Figure S5. Optogenetic activation of the activity of  $A_{2A}R^+$  neurons in the lateral septum (LS) of female  $A_{2A}R$ -Cre mice enhances depressive-like phenotype**

(a) Left: Schematic illustration of the location of virus injection and optic fibers implantation in female  $A_{2A}R$ -Cre mice. Right: A representative fluorescent image showing the ChR2-positive neurons (green) and the localization of the optic fibers. Nuclei are stained with DAPI in blue. Scale bar: 500/100  $\mu$ m. (b-e) Optogenetic activation of LS- $A_{2A}R^+$  neurons increased the immobility time in the tail suspension test (TST) (n=10 and 9 mice per group for EYFP and ChR2, respectively, two-sided Unpaired t test,  $P=0.0150$ ,  $t(17)=2.705$ ) (b) and reduced the time in open arms in the O maze test (n=10 and 9 mice per group for EYFP and ChR2, respectively, two-sided Mann-Whitney test,  $p=0.0081$ ,  $U=13.50$ ) (e), without affecting the total distance travelled (n=10 and 9 mice per group for EYFP and ChR2, respectively, two-sided Unpaired t test,  $p=0.1226$ ,  $t(17)=1.625$ ) (c) or the time in the central area in the open field (OF) test (n=10 and 9 mice per group for EYFP and ChR2, respectively, two-sided

Unpaired t test,  $p=0.2535$ ,  $t(17)=1.182$  (d). Data were shown as mean  $\pm$  SEM. \* $p < 0.05$ , \*\* $p < 0.01$ ; n.s., no significant difference. Source data are provided as a Source Data file.



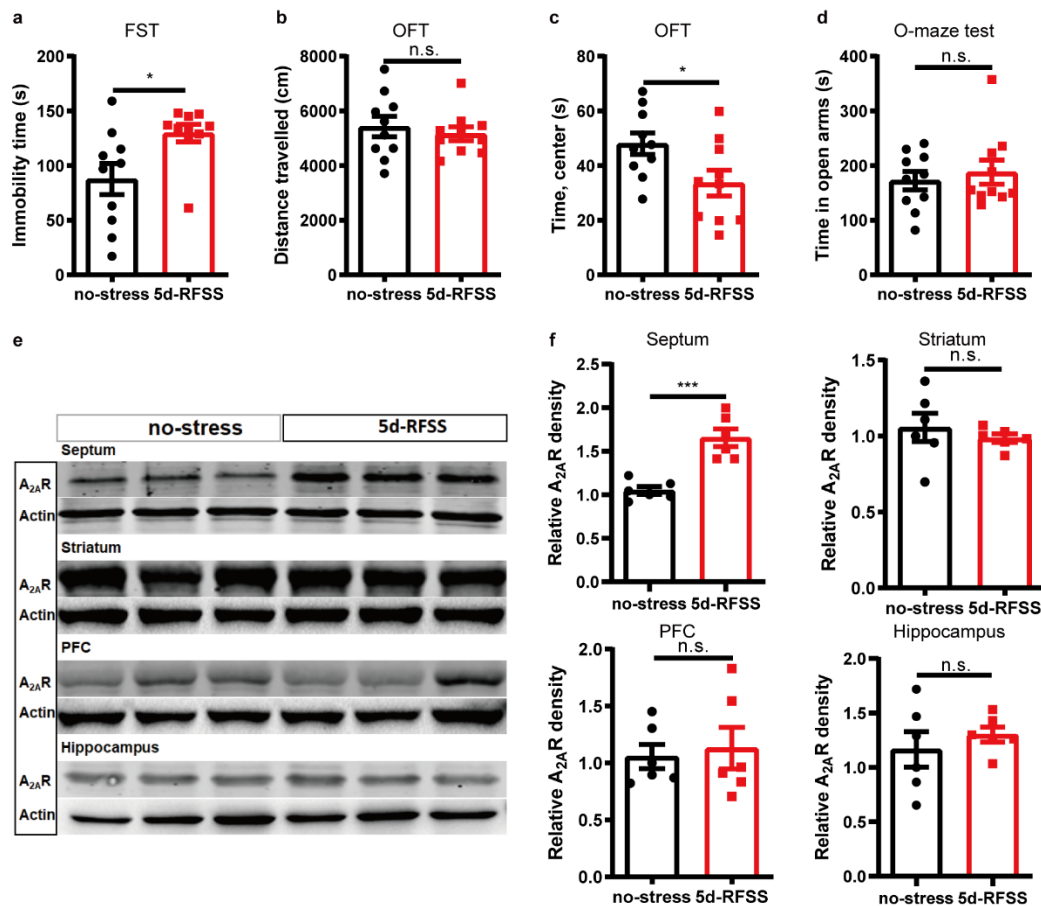

**Figure S6. A<sub>2A</sub>R is selectively upregulated in the lateral septum (LS) in the 5 days repeated forced swim stress (5d-RFSS) model**

(a-d) Compared to control mice, 5d-RFSS mice showed increased immobility time in a forced swimming test (FST) (n=10 mice/group, two-sided Mann-Whitney test,  $p=0.0138$ ,  $U=18$ ) (a) and reduced time in the central area in an open field test (OFT) (n=10 mice/group, two-sided Unpaired t test,  $p=0.0301$ ,  $t(18)=2.355$ ) (c), without change of the total distance travelled in the OFT (n=10 mice/group, two-sided Unpaired t test,  $p=0.5687$ ,  $t(18)=0.5806$ ) (b) and time spent in the open arms in an elevated O-maze test (n=10 mice/group, two-sided Mann-Whitney test,  $p=0.7394$ ,  $U=45$ ) (d). (e, f) Representative Western blot and quantification of A<sub>2A</sub>R protein levels in the septum (n=6 mice/group, two-sided Unpaired t test,  $p=0.0003$ ,  $t(10)=5.496$ ), striatum (n=6 mice/group, two-sided Unpaired t test,  $p=0.4878$ ,  $t(10)=0.7203$ ), prefrontal cortex (PFC) (n=6 mice/group, two-sided Unpaired t test,  $p=0.7341$ ,  $t(10)=0.3493$ ) and hippocampus (n=6 mice/group, two-sided Unpaired t test,  $p=0.4580$ ,

$t(10)=0.7719$ ) of 5d-RFSS and control mice. 5d-RFSS mice displayed a selective upregulation of A<sub>2A</sub>R in the septum without significant changes in the other three brain regions associated with mood processing. Data were shown as mean  $\pm$  SEM. \* $p < 0.05$ , \*\*\* $p < 0.001$ ; n.s., no significant difference. Source data are provided as a Source Data file.
